# Supplementary material for: Interactions among Trypanosoma brucei RAD51 paralogues in DNA repair and antigenic variation
Source: PubMed Central journal article supplement (PMC3170485; doi:10.1111/j.1365-2958.2011.07703.x), 2011-05-25
Supplement: mmi0081-0434-SD1.pdf [file mmi0081-0434-SD1.pdf]

**Interactions amongst *Trypanosoma brucei* RAD51 paralogues in DNA repair and antigenic variation**

Rachel Dobson, Christopher Stockdale, Craig Lapsley, Jonathan Wilkes and Richard McCulloch\*

University of Glasgow,  
College of Medical Veterinary and Life Sciences,  
Institute of Infection, Immunity and Inflammation,  
The Wellcome Trust Centre for Molecular Parasitology,  
Sir Graeme Davis Building,  
120 University Place,  
Glasgow,  
G12 8TA,  
U.K.

Phone: 44-141-330-5946

Fax: 44-141-330-5422

corresponding author (email: [richard.mcculloch@glasgow.ac.uk](mailto:richard.mcculloch@glasgow.ac.uk))

**Accession, or genome identification, numbers for the Rad51 paralogue-encoding genes used in this study.** Systematic names (e.g., RAD51-3, RAD51-4 etc) are not intended to infer orthology, except between *T. brucei*, *T. cruzi* and *L. major*.

## 1. Excavata.

|                              |                                                                                                                       |
|------------------------------|-----------------------------------------------------------------------------------------------------------------------|
| <i>Trichomonas vaginalis</i> | ( <a href="http://trichdb.org/trichdb/">http://trichdb.org/trichdb/</a> )                                             |
| RAD51                        | TVAG_204070                                                                                                           |
| DMC1                         | TVAG_155030                                                                                                           |
| RAD51-3                      | TVAG_426330                                                                                                           |
| RAD51-4                      | TVAG_144570                                                                                                           |
| <i>Giardia intestinalis</i>  | ( <a href="http://giardiadb.org/giardiadb/">http://giardiadb.org/giardiadb/</a> )                                     |
| DMC1A                        | XP_001709425; GL50803_13104                                                                                           |
| DMC1B                        | XP_001710001; GL50803_13346                                                                                           |
| <i>Trypanosoma brucei</i>    | ( <a href="http://tritrypdb.org/tritrypdb/">http://tritrypdb.org/tritrypdb/</a> )                                     |
| RAD51                        | Tb11.01.0360                                                                                                          |
| DMC1                         | Tb09.211.1210                                                                                                         |
| RAD51-3                      | Tb11.02.0150                                                                                                          |
| RAD51-4                      | Tb11.02.4880                                                                                                          |
| RAD51-5                      | Tb10.389.1770                                                                                                         |
| RAD51-6                      | Tb927.3.5230                                                                                                          |
| <i>Leishmania major</i>      | ( <a href="http://tritrypdb.org/tritrypdb/">http://tritrypdb.org/tritrypdb/</a> )                                     |
| RAD51                        | AAC16334; LmjF28.0550                                                                                                 |
| DMC1                         | LmjF35.4890                                                                                                           |
| RAD51-3                      | LmjF33.2490                                                                                                           |
| RAD51-4                      | LmjF11.0230                                                                                                           |
| RAD51-6                      | LmjF29.0450                                                                                                           |
| <i>Trypanosoma cruzi</i>     | ( <a href="http://tritrypdb.org/tritrypdb/">http://tritrypdb.org/tritrypdb/</a> )                                     |
| RAD51                        | Tc00.1047053503801.30                                                                                                 |
| DMC1                         | Tc00.1047053506885.310                                                                                                |
| RAD51-3                      | Tc00.1047053504153.220                                                                                                |
| TcrRAD51-4                   | Tc00.1047053503613.30                                                                                                 |
| RAD51-5                      | Tc00.1047053510123.30                                                                                                 |
| TcrRAD51-6                   | Tc00.1047053508075.20                                                                                                 |
| <i>Naegleria gruberi</i>     | ( <a href="http://genome.jgi-psf.org/Naegr1/Naegr1.home.html">http://genome.jgi-psf.org/Naegr1/Naegr1.home.html</a> ) |
| DMC1                         | jgi Naegr1 88262                                                                                                      |
| RAD51                        | jgi Naegr1 88260                                                                                                      |
| RAD51-3                      | fgeneshNG_pg.scaffold_18000116                                                                                        |
| RAD51-4                      | jgi Naegr1 45247                                                                                                      |
| RAD51-5                      | jgi Naegr1 88254                                                                                                      |

## 2. Chromalveolata

|                                 |                                                                                                                       |
|---------------------------------|-----------------------------------------------------------------------------------------------------------------------|
| <i>Thalassiosira pseudonona</i> | ( <a href="http://genome.jgi-psf.org/Thaps3/Thaps3.home.html">http://genome.jgi-psf.org/Thaps3/Thaps3.home.html</a> ) |
| RAD51                           | jgi Thaps3 255596                                                                                                     |
| RAD51-2                         | jgi Thaps3 257784                                                                                                     |
| RAD51-3                         | jgi Thaps3 261577                                                                                                     |
| <i>Cryptosporidium parvum</i>   | ( <a href="http://cryptodb.org/cryptodb/">http://cryptodb.org/cryptodb/</a> )                                         |
| RAD51                           | cgd5_410                                                                                                              |
| DMC1                            | cgd7_1690                                                                                                             |
| RAD51-3                         | cgd2_4070                                                                                                             |
| RAD51-4                         | cgd6_4800                                                                                                             |
| <i>Theileria annulata</i>       | ( <a href="http://old.genedb.org/genedb/annulata/">http://old.genedb.org/genedb/annulata/</a> )                       |
| RAD51                           | TA07350                                                                                                               |
| DMC1                            | TA07075                                                                                                               |
| RAD51-3                         | TA12290                                                                                                               |

|                                |                                                                                                       |
|--------------------------------|-------------------------------------------------------------------------------------------------------|
| <i>Plasmodium falciparum</i>   | ( <a href="http://plasmodb.org/plasmo/">http://plasmodb.org/plasmo/</a> )                             |
| RAD51                          | PF11_0087                                                                                             |
| DMC1                           | MAL8P1.76                                                                                             |
| RAD51-3                        | PFD0935c                                                                                              |
| <i>Toxoplasma gondii</i>       | ( <a href="http://toxodb.org/toxo/">http://toxodb.org/toxo/</a> )                                     |
| RAD51                          | 59.m03654                                                                                             |
| DMC1                           | 35.m00010                                                                                             |
| RAD51-3                        | 645.m00312                                                                                            |
| <i>Tetrahymena thermophila</i> | ( <a href="http://ciliate.org/index.php/home/welcome">http://ciliate.org/index.php/home/welcome</a> ) |
| RAD51                          | TTERM_00142330                                                                                        |
| DMC1                           | TTHERM_00459230                                                                                       |
| RAD51-3                        | TTHERM_01143840                                                                                       |

### 3. Plantae

|                             |             |
|-----------------------------|-------------|
| <i>Arabidopsis thaliana</i> |             |
| RAD51                       | NP_568402   |
| DMC1                        | JC4092      |
| RAD51C                      | NP_566040   |
| RAD51B                      | NP_180423   |
| RAD51D                      | NP_172254   |
| XRCC2                       | NP_201257   |
| XRCC3                       | NP_851202   |
| RECA1                       | Q39199.1    |
| RECA2                       | NP_179539.2 |
| RECA3                       | NP_187625.2 |

### 4. Amoebozoa

|                                 |                                                                                                                                                   |
|---------------------------------|---------------------------------------------------------------------------------------------------------------------------------------------------|
| <i>Entamoeba histolytica</i>    | ( <a href="http://www.sanger.ac.uk/cgi-bin/blast/submitblast/e_histolytica">http://www.sanger.ac.uk/cgi-bin/blast/submitblast/e_histolytica</a> ) |
| RAD51                           | 63.m00157; EHI_031220)                                                                                                                            |
| DMC1                            | 10.m00382; EHI_050430)                                                                                                                            |
| RAD51-3                         | 59.m00167; EHI_122860)                                                                                                                            |
| <i>Dictyostelium discoideum</i> | ( <a href="http://dictybase.org/">http://dictybase.org/</a> )                                                                                     |
| RAD51                           | DDB0168161; DDB0217219                                                                                                                            |
| RAD51-2                         | DDB0186043                                                                                                                                        |
| RAD51-3                         | DDB018559                                                                                                                                         |
| RAD51-4                         | DDB0186432                                                                                                                                        |
| RAD51-5                         | DDB0188824                                                                                                                                        |
| RAD51-6                         | DDB021753                                                                                                                                         |
| RECA                            | DDB0169470                                                                                                                                        |

### 5. Opisthokonta

|                                  |                                                                                       |
|----------------------------------|---------------------------------------------------------------------------------------|
| <i>Encephalitozoon uniculi</i>   | ( <a href="http://microsporidiadb.org/micro/">http://microsporidiadb.org/micro/</a> ) |
| RAD51                            | Q8SQX0_ENCCU                                                                          |
| RAD51-2                          | Q8SW20_ENCCU                                                                          |
| <i>Schizosaccharomyces pombe</i> |                                                                                       |
| RHP51                            | P36601                                                                                |
| DMC1                             | O4263                                                                                 |
| RDH55                            | O14129                                                                                |
| RDH57                            | Q9UUL2                                                                                |
| <i>Saccharomyces cerevisiae</i>  |                                                                                       |
| RAD51                            | NP_011021                                                                             |
| DMC1                             | NP_011106                                                                             |
| RAD57                            | NP_010287                                                                             |
| RAD55                            | NP_010361                                                                             |
| <i>Ustilago maydis</i>           |                                                                                       |
| RAD51                            | AAC61878                                                                              |

|                                |                     |
|--------------------------------|---------------------|
| REC2                           | A56244              |
| <i>Caenorhabditis elegans</i>  |                     |
| RAD51                          | O44246 O44246_CAEEL |
| Rfs-1                          | P34348 YK82_CAEEL   |
| <i>Drosophila melanogaster</i> |                     |
| RAD51                          | BAA04580            |
| SPND                           | NP_733200           |
| SPNB                           | NP_476740           |
| RAD51C                         | NP_610466           |
| RAD51D                         | NP_573302           |
| <i>Homo sapiens</i>            |                     |
| RAD51                          | Q06609              |
| DMC1                           | Q14565              |
| XRCC2                          | O43543              |
| XRCC3                          | O43542              |
| RAD51B                         | O15315              |
| RAD51D                         | AAC39719            |
| RAD51C                         | AAC39604            |

## Supplementary figure legends

**Supplementary Figure 1. Generation of *RAD51-4* and *RAD51-6* mutants in bloodstream form *T. brucei*.** **A.** For both genes, the RecA-fold core of the ORF (white) was deleted ( $\Delta$ ), removing the Walker A and B boxes (black) and replaced with cassettes encoding either blasticidin (*BSD*, see **B**) or puromycin (*PUR*) resistance. **B, C.** Southern blots of genomic DNA from wild type (WT) cells, two heterozygous mutants (+/- 1, 2) and two homozygous mutants (-/- 1, 2) probed with the ORFs of *RAD51-4* or *RAD51-6*, respectively. *RAD51-4* mutants' DNA was digested with *AgeI*, and *RAD51-6* DNA by *NdeI*. Positions of size markers (in kb) are shown, and hybridising fragments from the WT alleles, or from *BSD*- or *PUR*-disrupted ( $::$ ) alleles, are indicated. **D.** Reverse transcriptase PCR from WT, +/-, -/- or re-expresser (-/-+) cells using primers specific for *RAD51-4* or *RAD51-6*; RNA Polymerase (Pol) I-specific primers demonstrate intact cDNA in the -/- mutants. RT+ denotes the inclusion of reverse transcriptase during cDNA synthesis, RT- denotes controls in which the enzyme was omitted.

**Supplementary Figure 2. DNA damage sensitivity in *T. brucei* *RAD51* and *RAD51* paralogue mutants.** **A.** The concentration of methyl methanesulphonate (MMS) that caused 50% growth inhibition (IC<sub>50</sub>) of wild type (WT) cells is compared with two (1, 2) independent heterozygous (+/-) and homozygous (-/-) mutants of *RAD51-4* and *RAD51-6*, as well as with -/- cells re-expressing the mutated protein (-/-+). **B.** Comparison of the MMS IC<sub>50</sub>s of WT, *rad51*-/-, *rad51-3*-/-, *rad51-4*-/-, *rad51-5*-/- and *rad51-6*-/- cells. Values are averages from at least 3 experiments; bars indicate standard deviation.

**Supplementary Figure 3. Clonal survival of *RAD51-4* (A) and *RAD51-6* (B) mutants *in vitro* when treated with phleomycin or methyl methanesulphonate (MMS).** Cell survival is shown as a percentage of clonal growth when treated with the DNA damaging agent compared with growth in the absence of drug. For each graph, wildtype 3174.2 (wt), two independent heterozygous mutants (X+/-, Y+/-), and two independent homozygous mutants (X-/-, Y-/-) are shown at the drug concentrations indicated; in addition, *RAD51* paralogue re-expresser cells (-/-+) are shown for the MMS assay. The graph shows the means of triplicate data, with 95 % confidence intervals indicated by error bars; growth was measured 10-14 days after the plating the cells out at 1 cell/well in 96 well plates.

**Supplementary Figure 4. *RAD51* subnuclear foci in *T. brucei* bloodstream stage cells.** Example of a wild type (WT) *T. brucei* cells with differing numbers of discernible sub-nuclear *RAD51* foci following 18 hrs growth in 1.0  $\mu\text{g}\cdot\text{ml}^{-1}$  phleomycin are shown. For comparison, the lack of detectable *RAD51* in *rad51*-/- cells is shown (top). Cells were visualised by differential interference contrast (DIC; right centre), the DNA was stained with DAPI (left centre), and *RAD51* (left) was visualised by indirect immunofluorescence using a polyclonal anti-*RAD51* antiserum and SFX-conjugated goat-derived anti-rabbit secondary; merged DAPI and *RAD51* images are shown (centre), as well as merged DAPI, *RAD51* and DIC images (right).

**Supplementary Figure 5. *RAD51* localisation in bloodstream form *T. brucei* *rad51-4*-/- and *rad51-6*-/- cells.** Examples are shown of *RAD51* localisation in *rad51-4*-/- and *rad51-6*-/- cells in the absence of induced DNA damage, or following 18 hrs growth in 1.0  $\mu\text{g}\cdot\text{ml}^{-1}$  phleomycin [BLE]. The organisation of the images, and the way *RAD51*, DNA and cells were visualised, is as described in Supp Fig. 3.

**Supplementary Figure 6. *RAD51* localisation in bloodstream form *T. brucei* *rad51*-/-, *rad51-3*-/- and *rad51-5*-/- cells.** Examples are shown of *RAD51* localisation in *rad51*-/-, *rad51-3*-/- and *rad51-5*-/-

/- cells following 18 hrs growth in  $1.0 \mu\text{g}\cdot\text{ml}^{-1}$  phleomycin [BLE]. The organisation of the images, and the way RAD51, DNA and cells were visualised, is as described in Supp Fig. 3.

**Supplementary Figure 7. RAD51 expression in *T. brucei* RAD51 paralogue mutants.** Western blot of whole cell extracts, after SDS-PAGE, from wild type (wt), *rad51*<sup>-/-</sup>, *rad51-3*<sup>-/-</sup>, *rad51-4*<sup>-/-</sup>, *rad51-5*<sup>-/-</sup> and *rad51-6*<sup>-/-</sup> cells, probed with anti-RAD51 antiserum. Expression of RAD51 is indicated, as well as a cross-reacting band in all samples (\*), and a smaller band seen only in the RAD51 paralogue mutants (?). Size markers are shown.

**Supplementary Figure 8. Analysis of the switching mechanisms of *RAD51-4* and *RAD51-6* mutant cell lines.** The graph shows the VSG switching mechanism of cell lines as a percentage of the total analysed. Wildtype strain 3174.2 (wt), two independent heterozygous mutants (X+/-, Y+/-), two independent homozygous mutants (X-/-, Y-/-) and RAD51 paralogue re-expresser (X-/-+) cells are shown. The assay allowed differentiation of *in situ* transcriptional switching (*in situ*), expression site gene conversion (ES GC) and VSG gene conversion (VSG GC). Switch reactions that could not be assigned in these categories are indicated as “unknown”. The graph shows the means of triplicate data, with the 95 % confidence intervals indicated by the error bars.

**Supplementary Figure 9. Western analysis showing the specificity of anti-RAD51 paralogue antibodies.** For each protein western blots are shown of three SDS-PAGE gels: GST-RAD51 (51) and GST-RAD51 paralogue (numbered 3, 4, 5, 6, corresponding with RAD51-3, RAD51-4, RAD51-5 and RAD51-6, respectively) recombinant proteins purified from *E. coli* (left blot); whole cell extracts from wildtype (wt) and *rad51* paralogue homozygous mutant (-/-) *T. brucei* cells probed with un-purified antiserum (middle blot) and affinity purified antiserum (right blot). Arrows indicate the predicted size of the native or GST-tagged RAD51 paralogue proteins; size markers are indicated (kDa).

**Supplementary Figure 10. Synteny between *T. brucei* and *L. major* in the genomic environment around *T. brucei* RAD51-5.** Percent sequence identity (large font) and similarity (small font) are shown when the predicted amino acid sequences of the genes surrounding *T. brucei* RAD51-5 were compared with orthologues on *L. major* chromosome 33; ORFs are indicated as red or blue arrows; *T. brucei* RAD51-5 is indicated by a dark blue arrow, and a potential RAD51-5-like gene in *L. major* by a light blue arrow.

**Supplementary Figure 11. An alignment of *T. brucei* and *T. cruzi* RAD51-5 with the predicted amino acid sequence of a putative RAD51-5 orthologue in *L. major*, *L. braziliensis*, and *L. infantum*.** The alignment was performed using Clustal X; residues that are identical in  $\geq 30\%$  of the sequences are shown in black; those that are conserved in  $\geq 30\%$  are in grey. The positions of conserved RecA/Rad51 features in TbRAD51-5 and TcRAD51-5 are indicated: Walker A and B motifs, including critical residues (circles), are indicated in green, and RecA homology upstream of the Walker A motif is indicated by a dashed line.

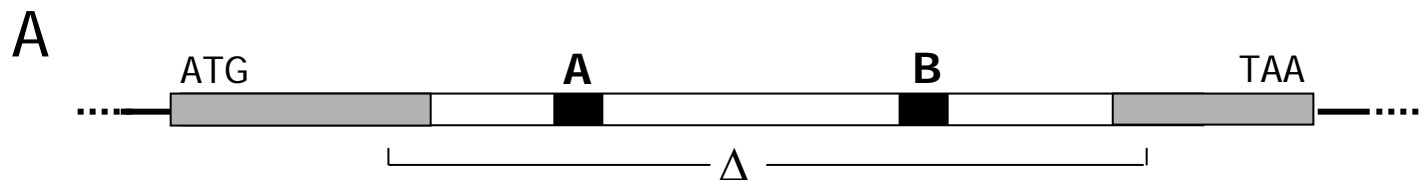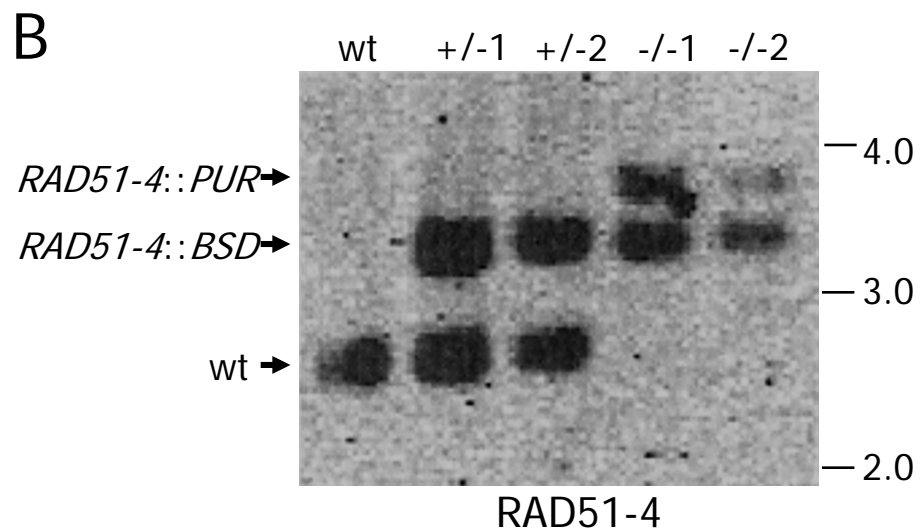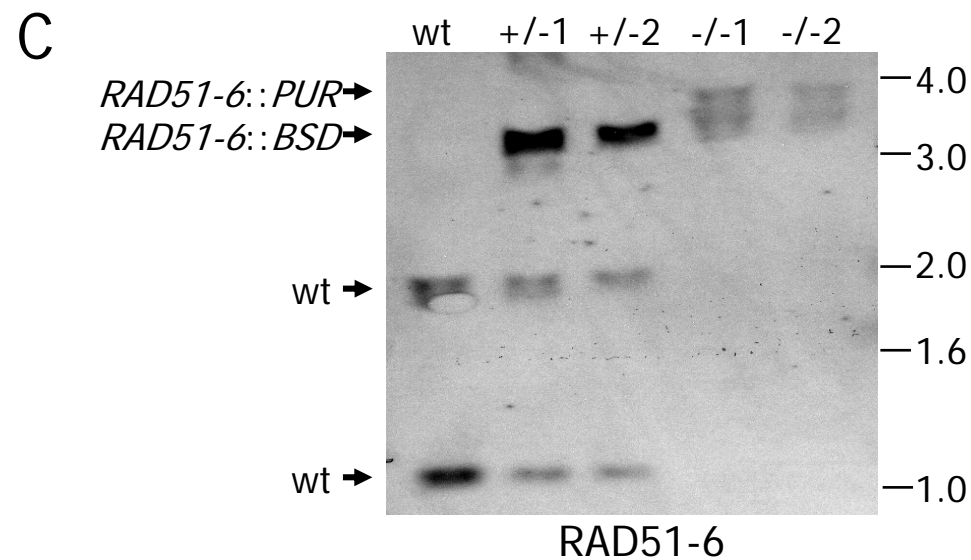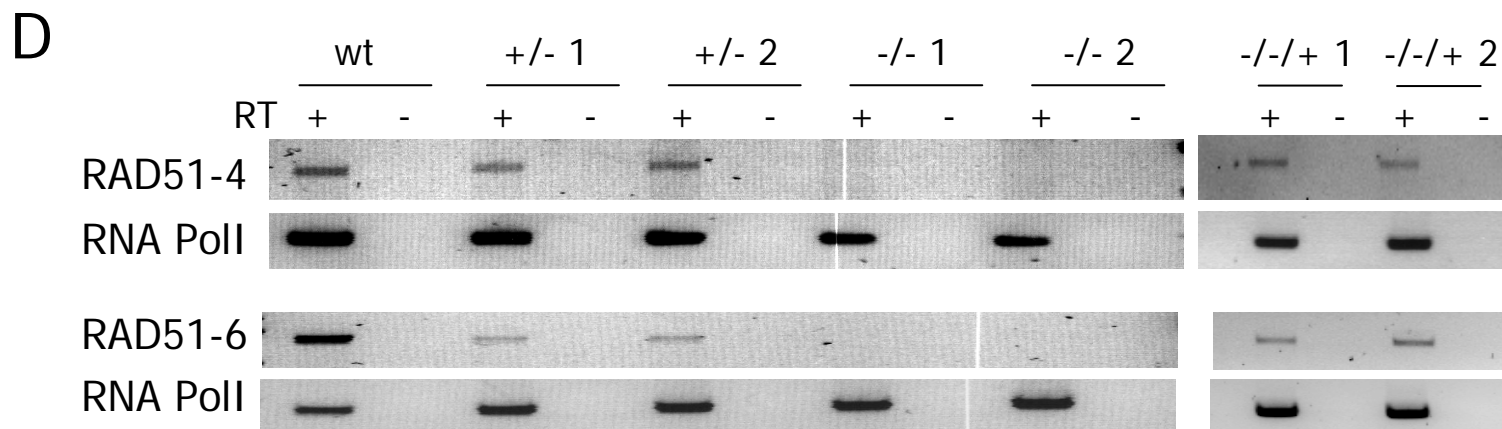

**A**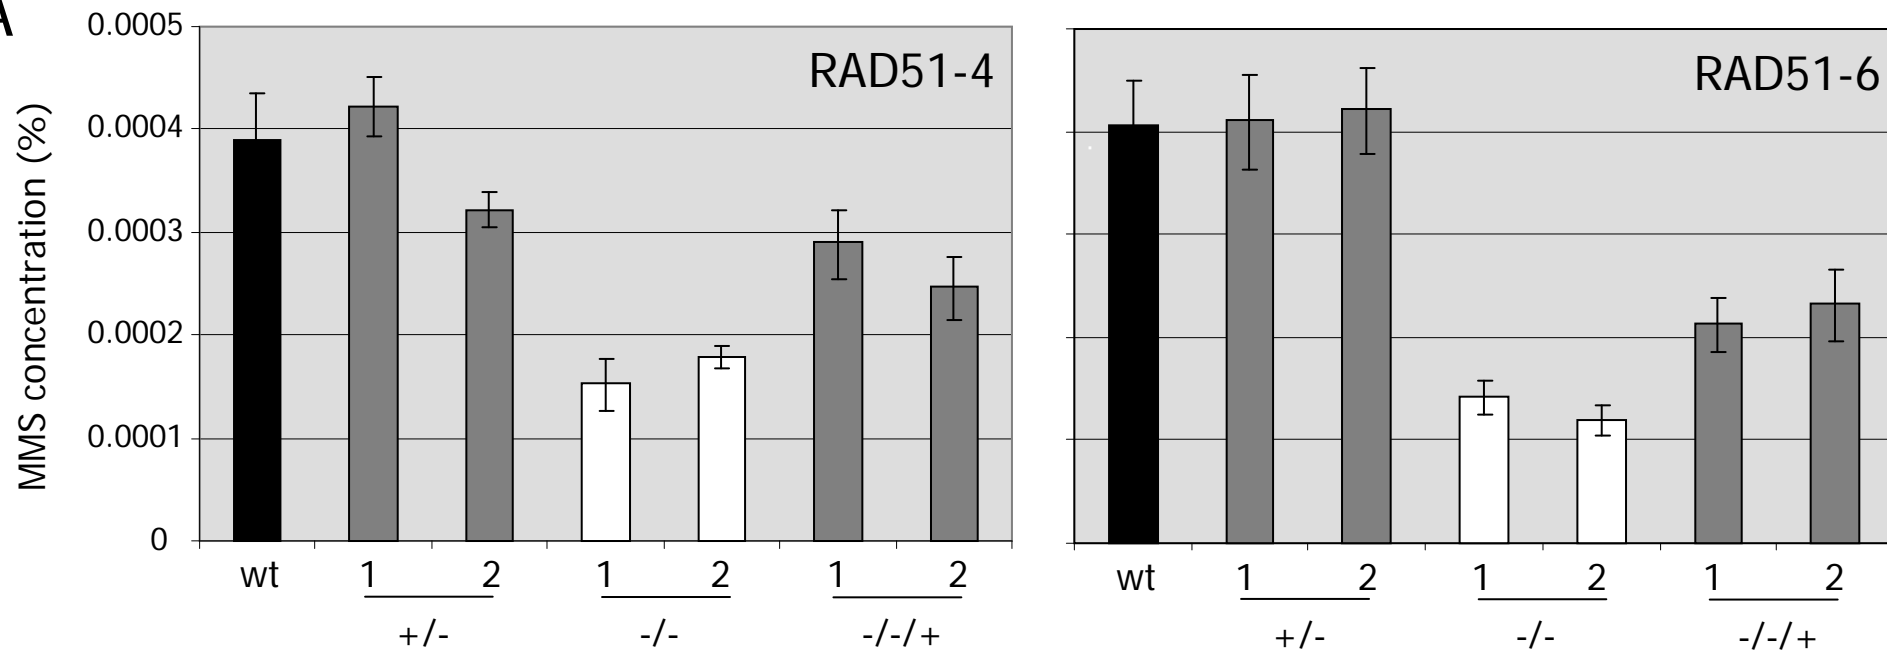**B**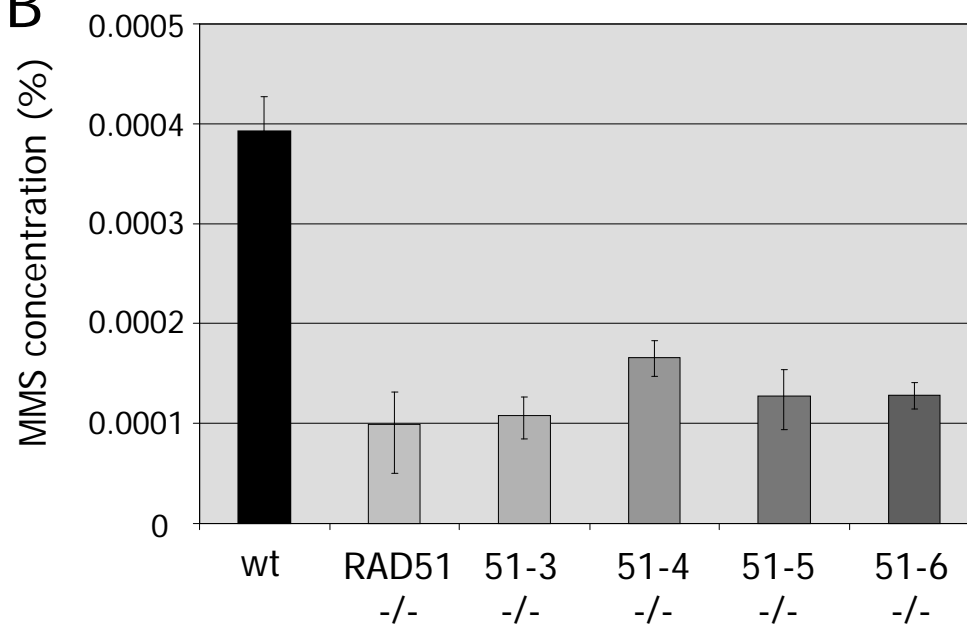



A

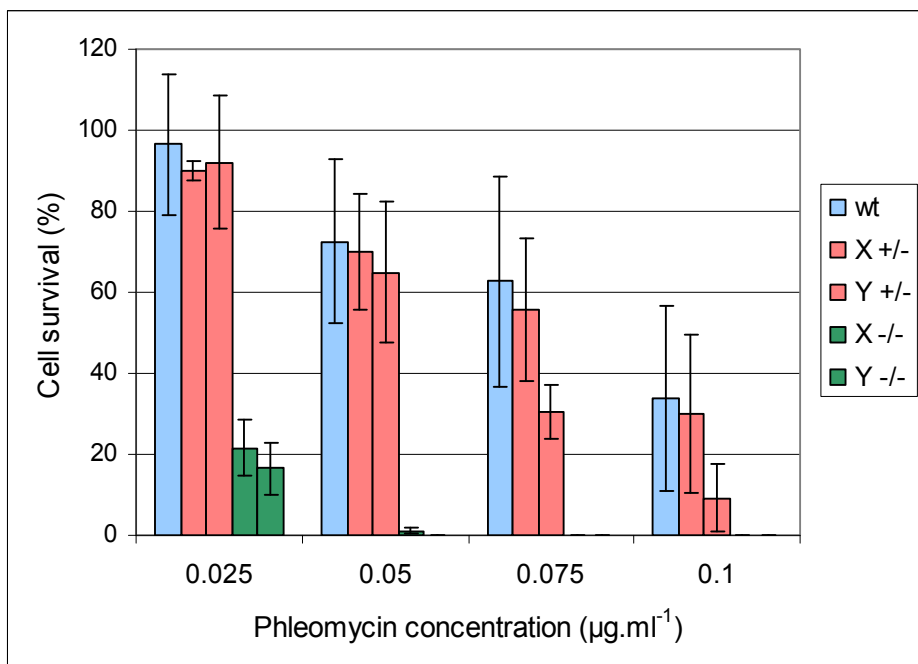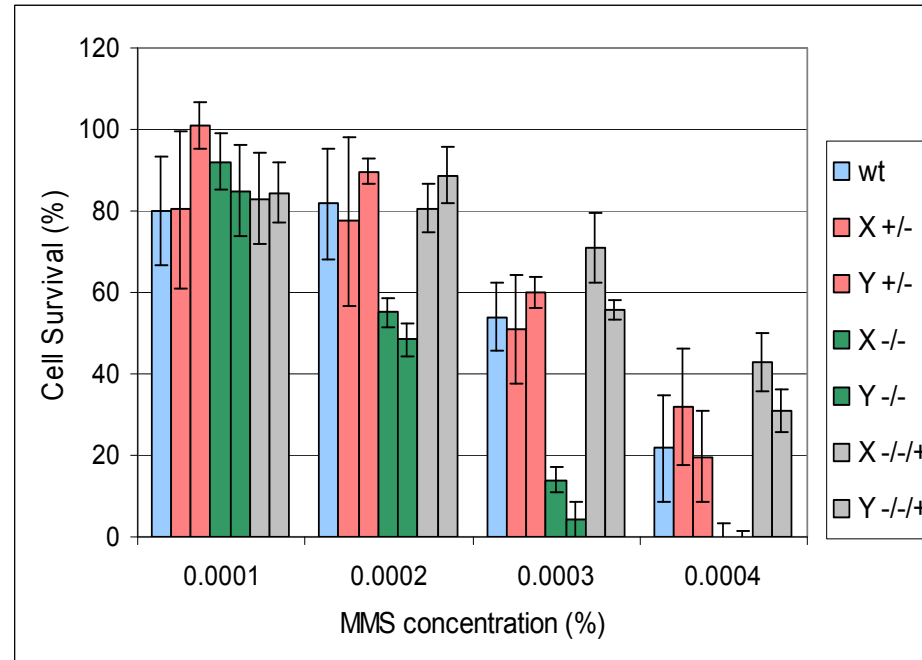

B

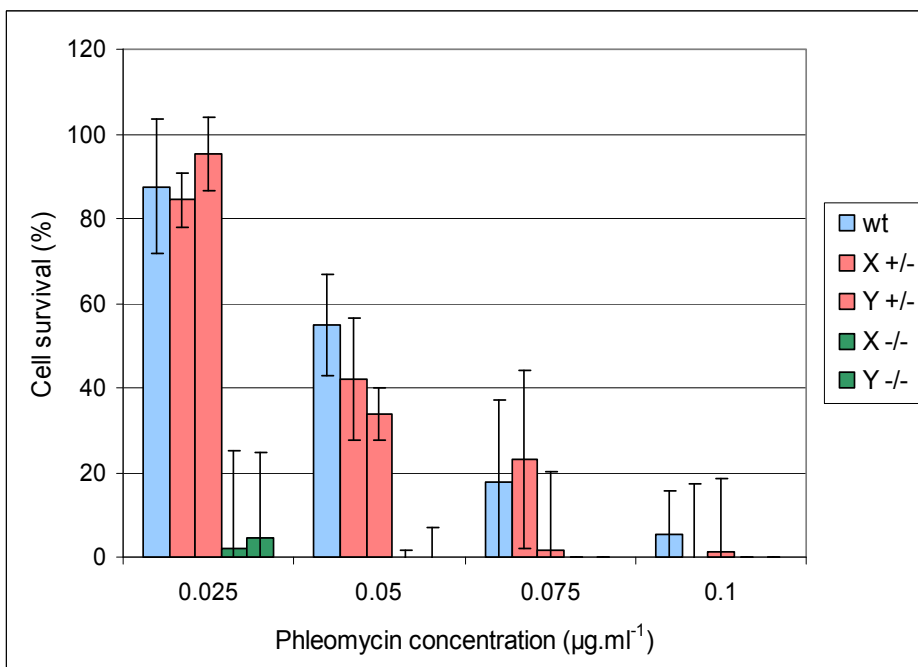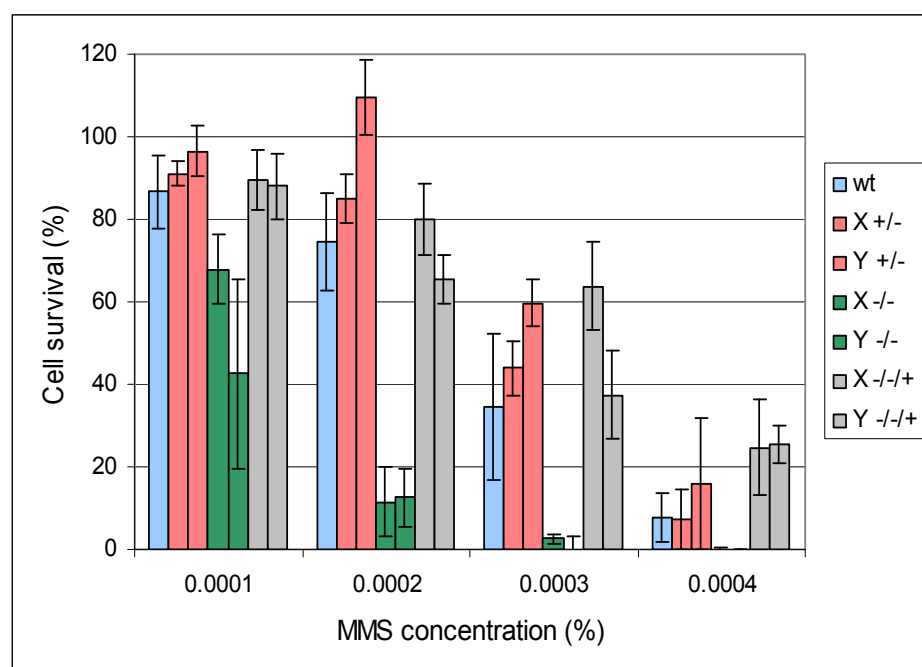

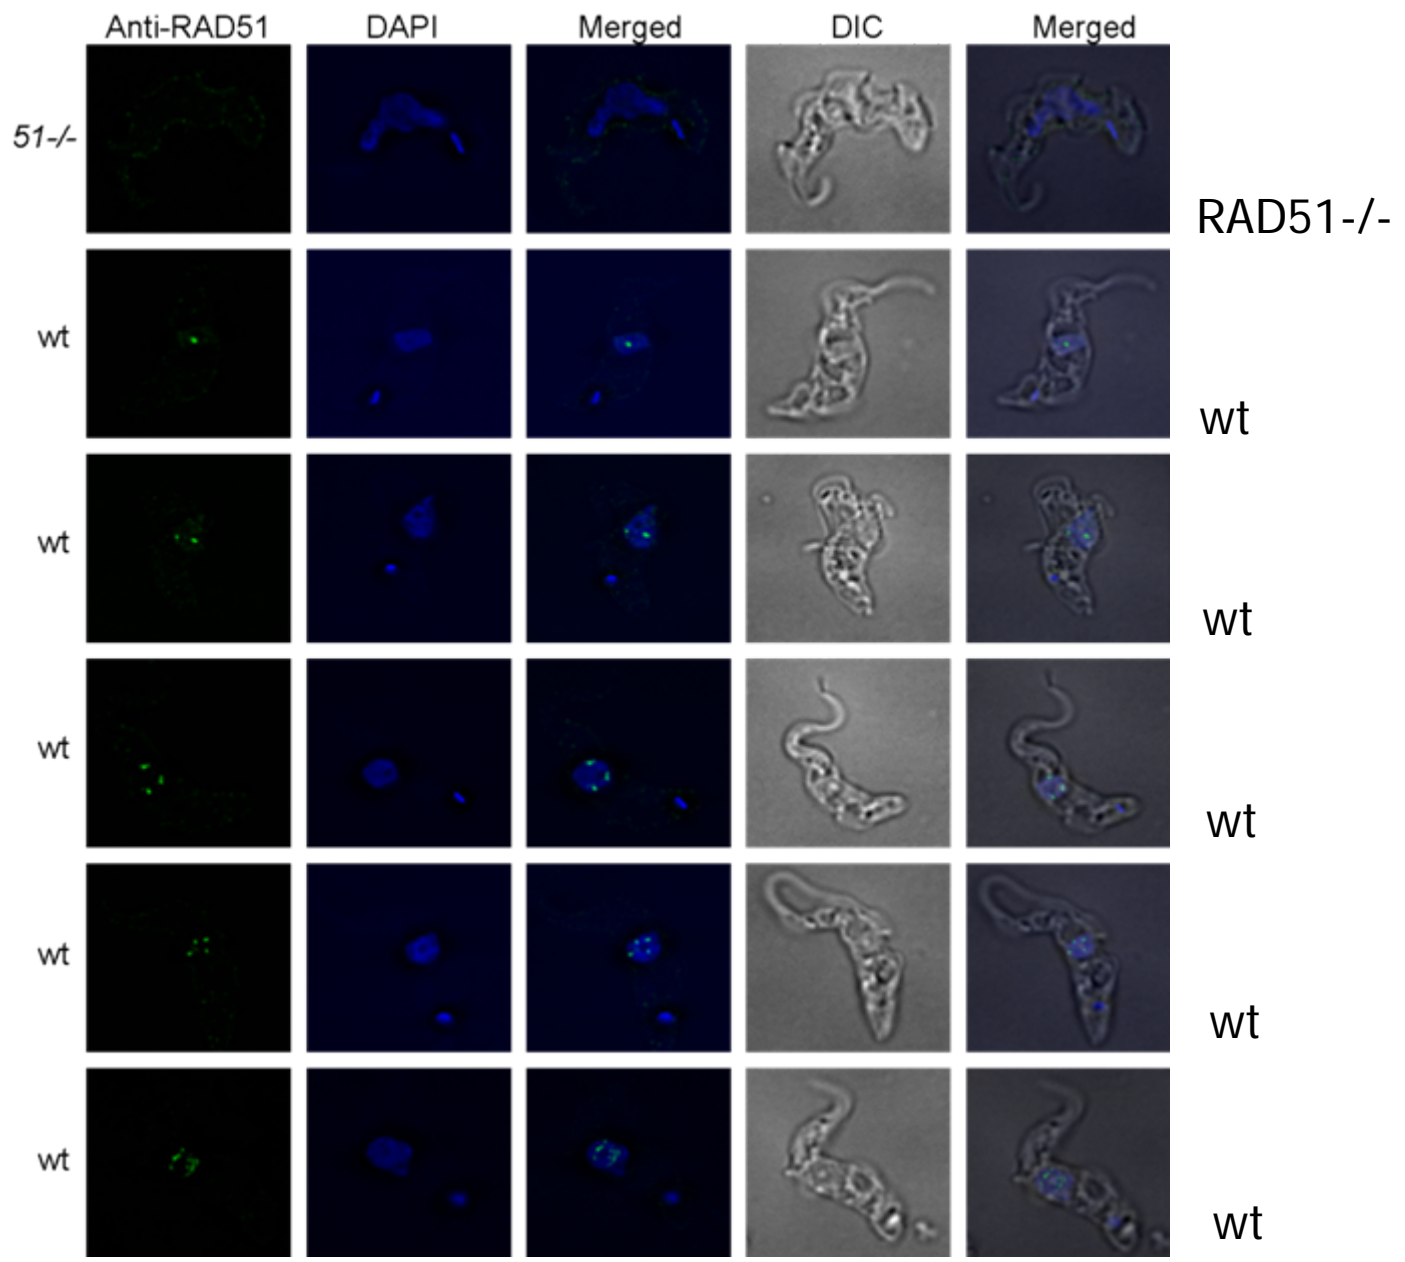

Suppl Figure 4

18 hrs, 1.0 ug.ml<sup>-1</sup> phleomycin

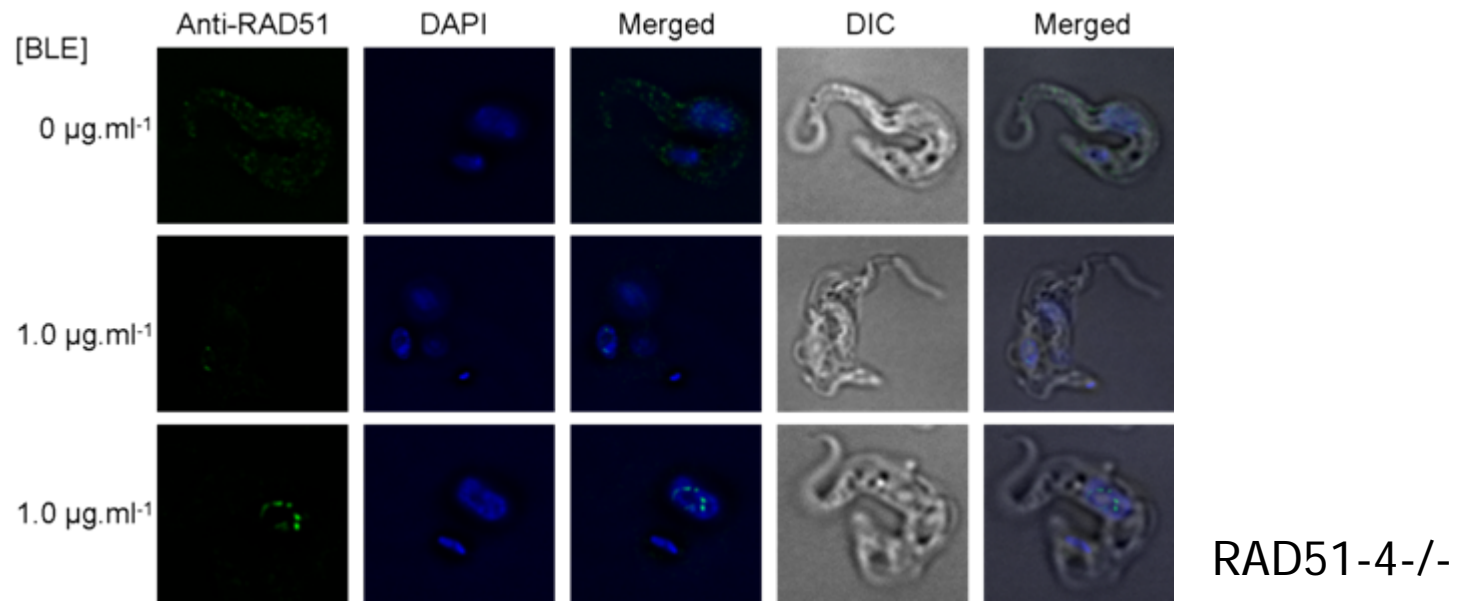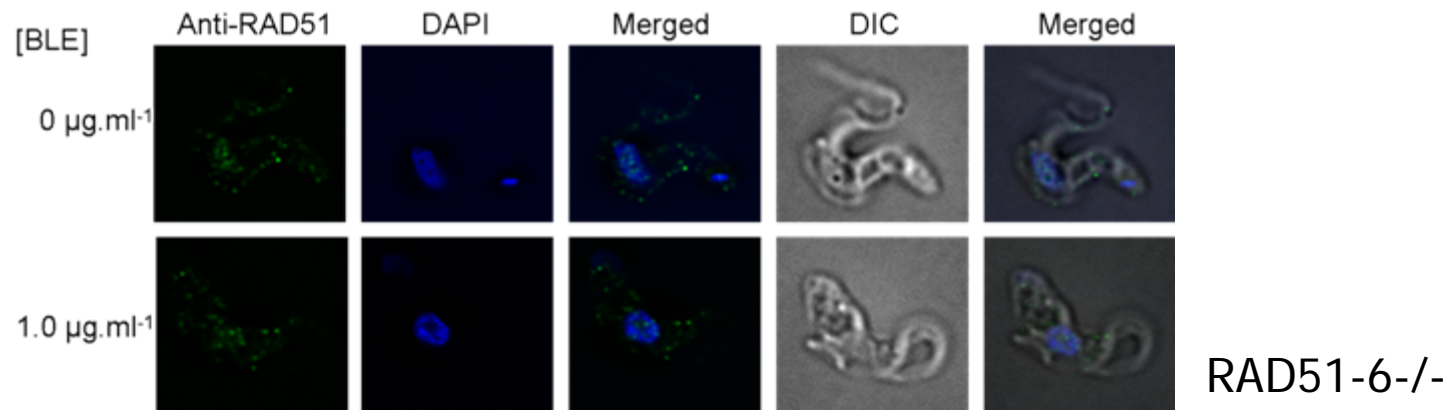

Suppl Figure 5

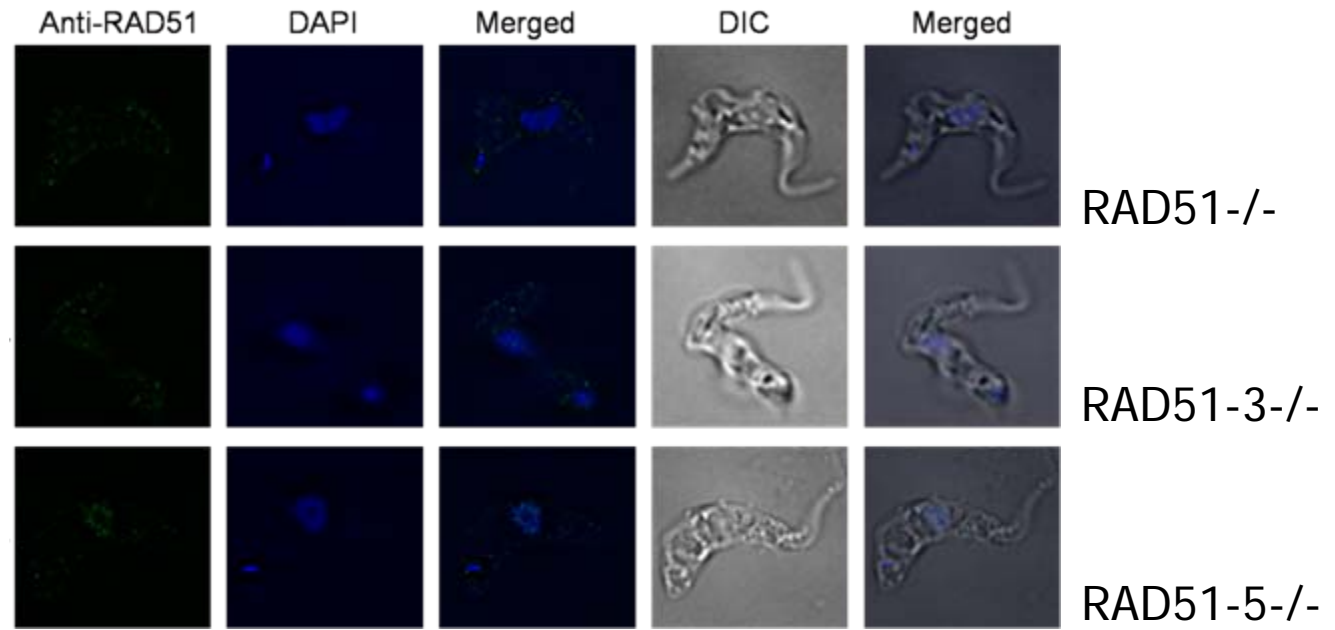

18 hrs, 1.0 ug.ml<sup>-1</sup> phleomycin

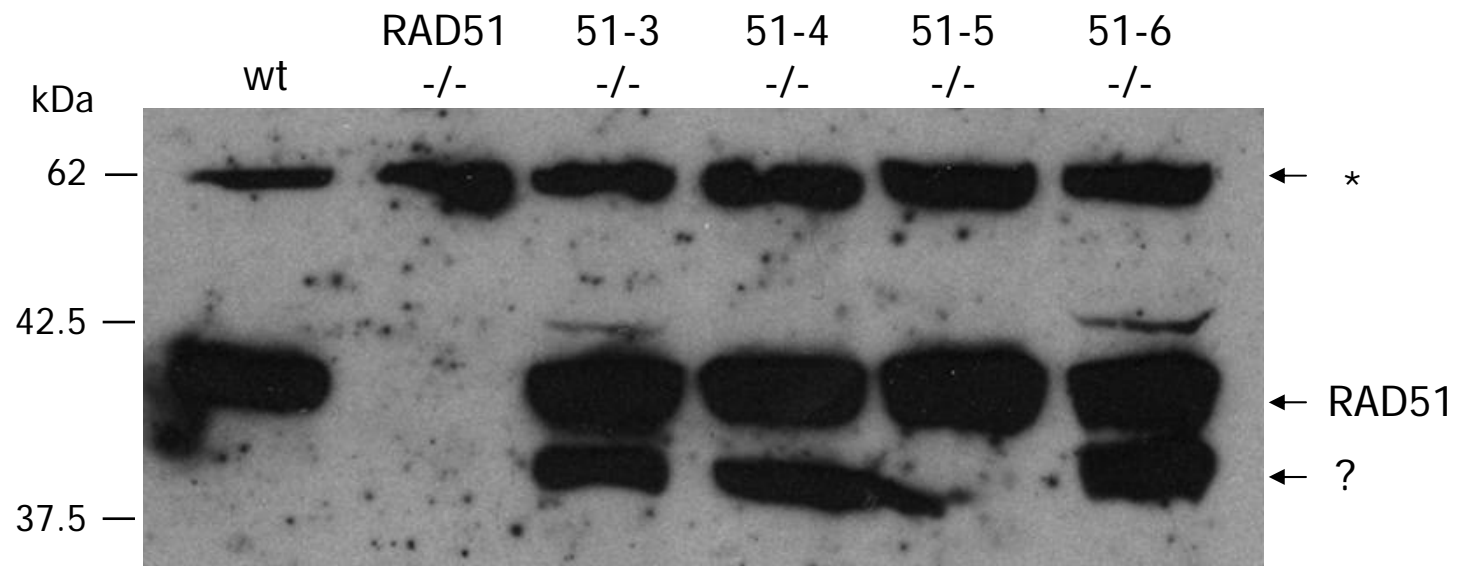

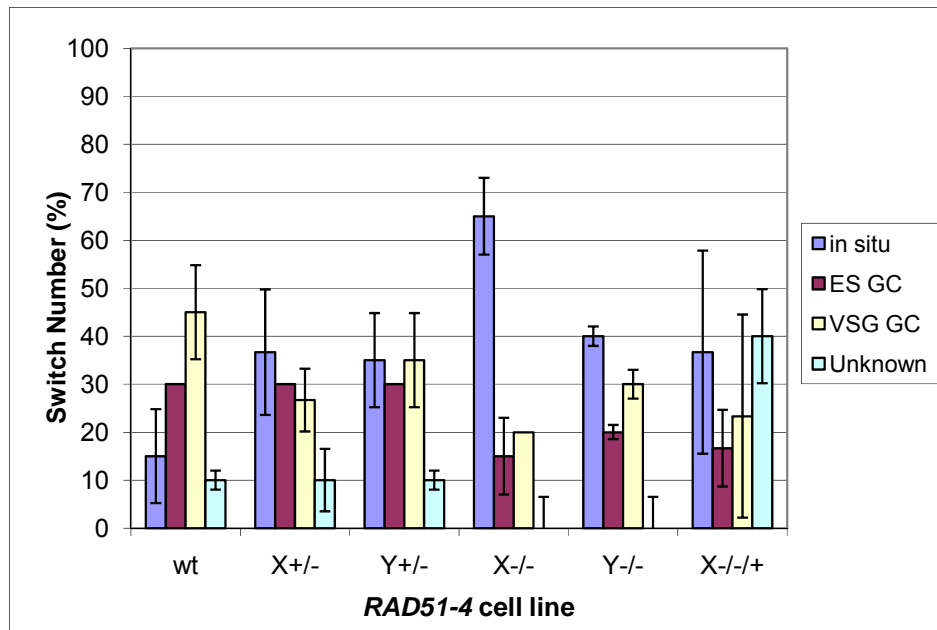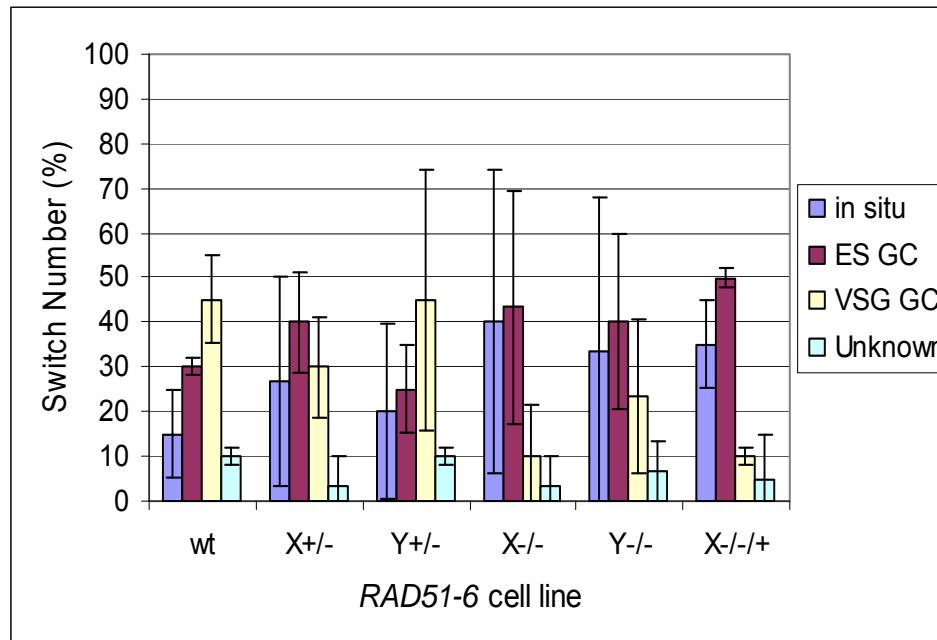

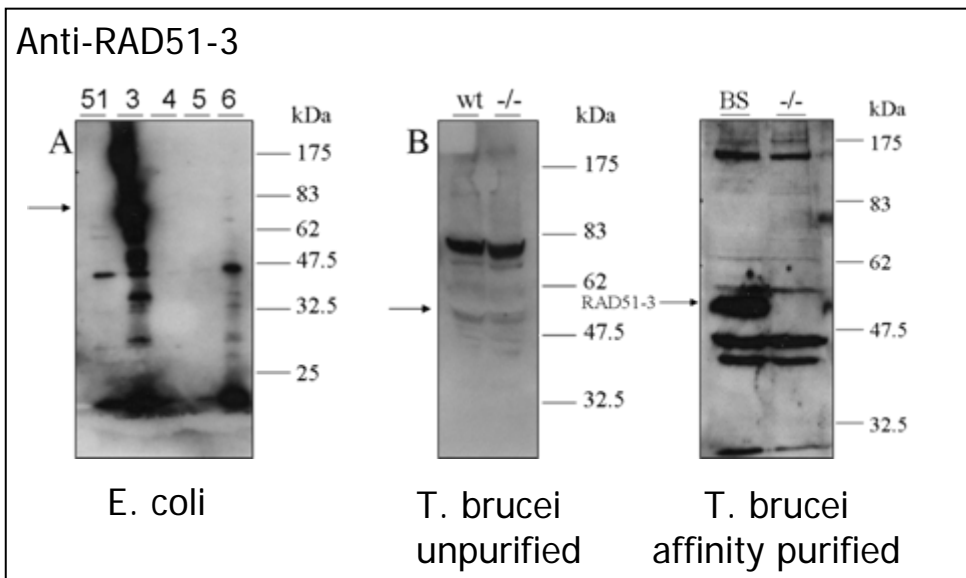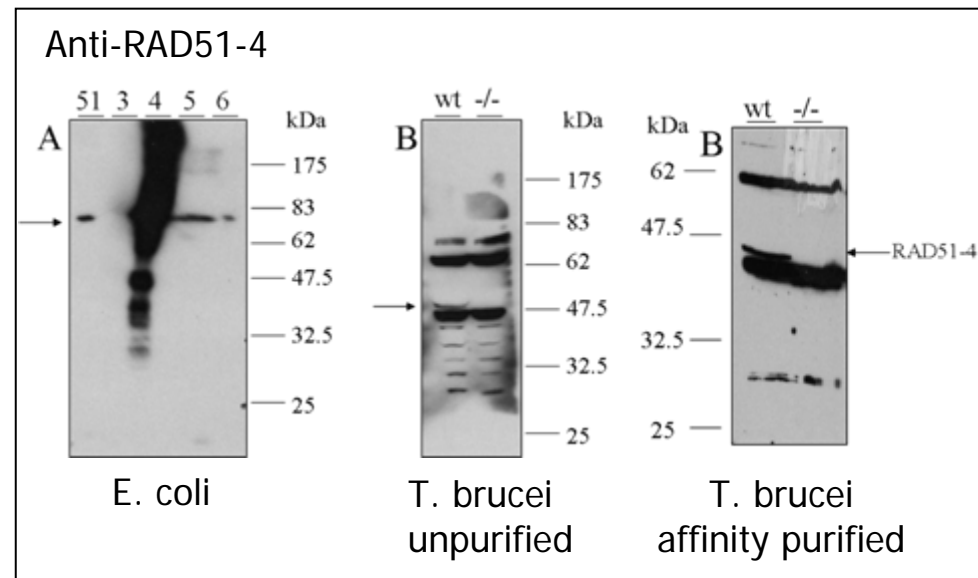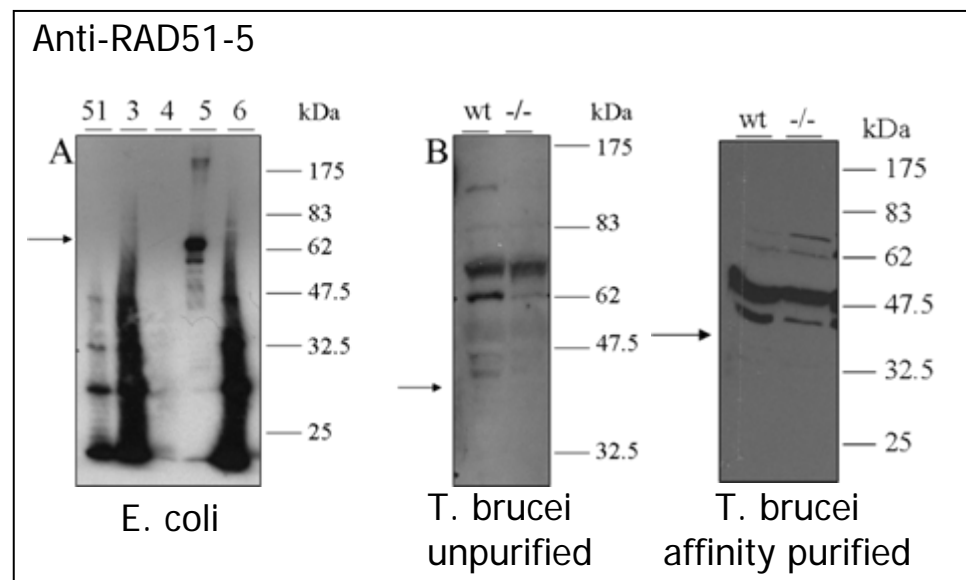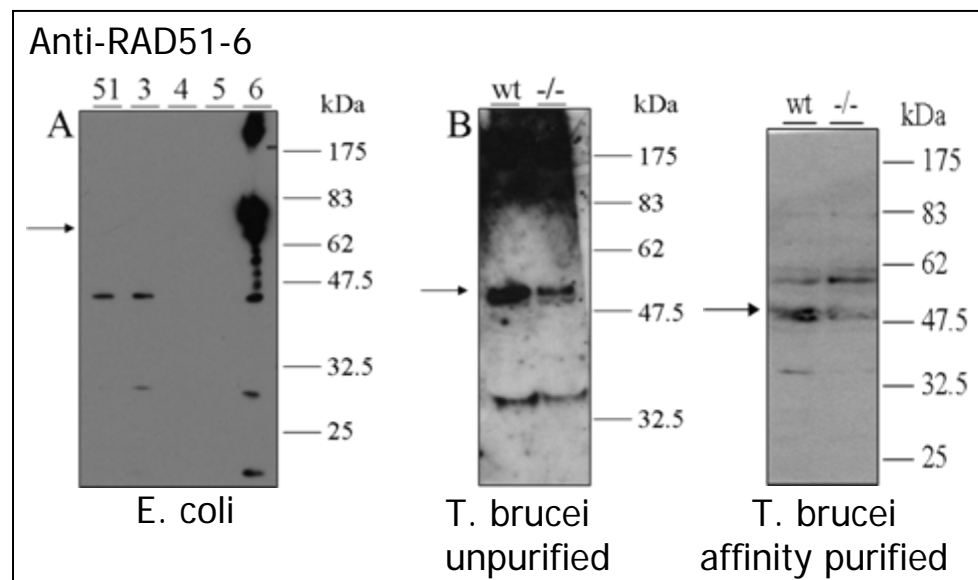

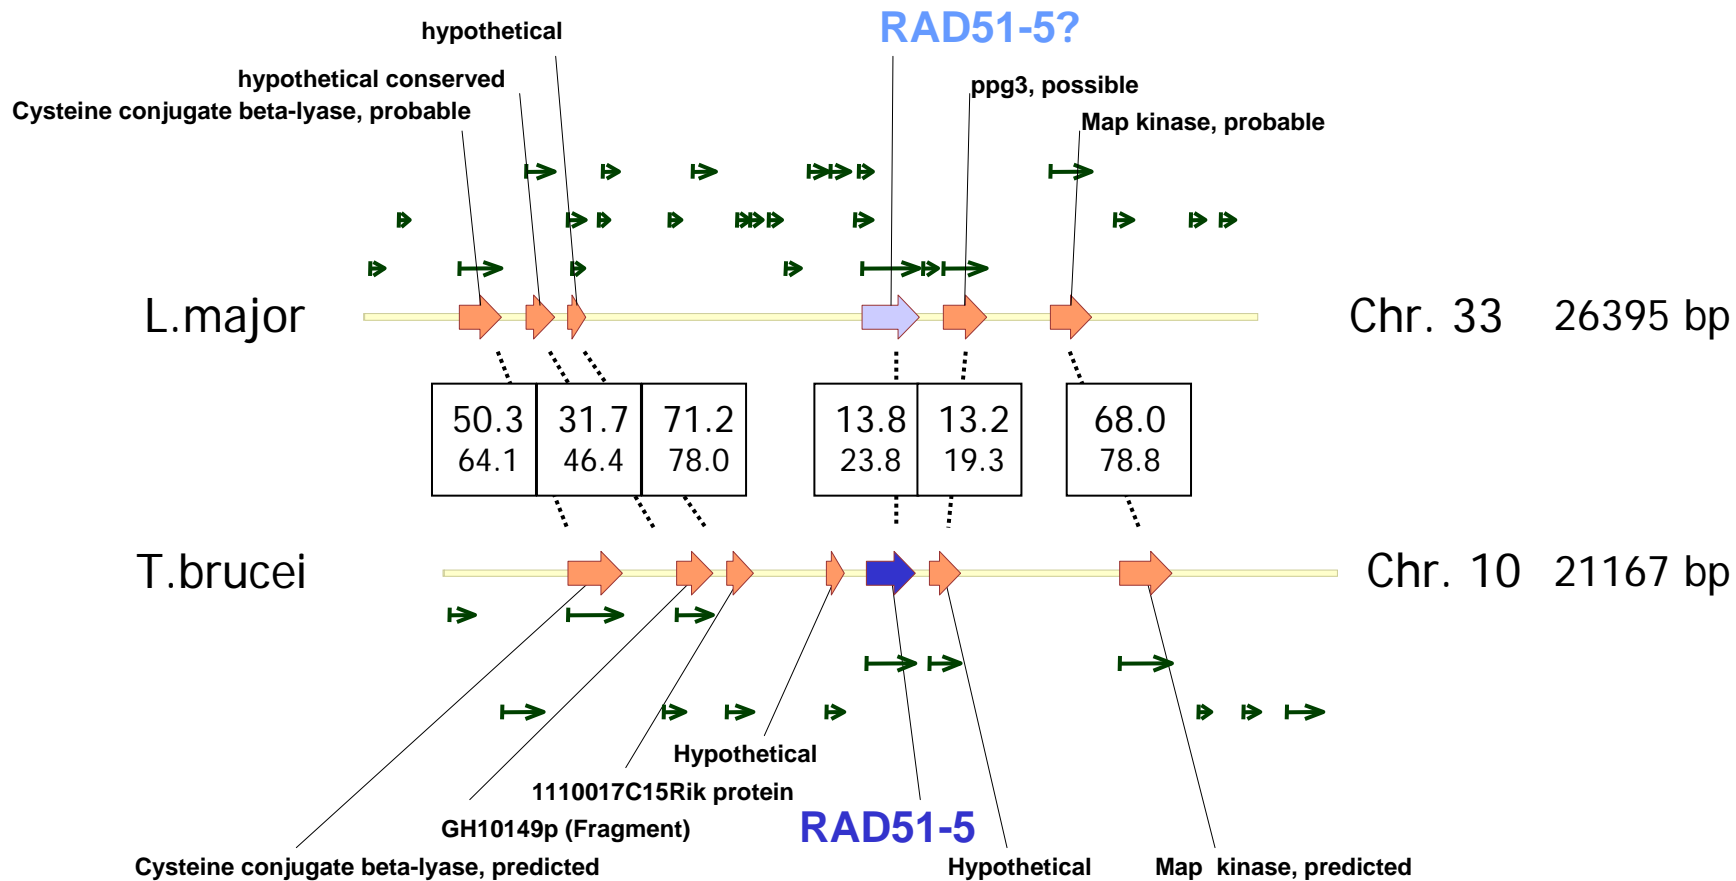



```

LmaRAD51-5? 1 -----
LifRAD51-5? 1 -----
LbrRAD51-5? 1 MOSTTASWETMSDSAARAVLRLROSATPLODVYGFSPWOHLSTSLPGLDSSLVAGVC
TbrRAD51-5 1 -----
TcrRAD51-5 1 -----

LmaRAD51-5? 1 -----MTMTRQWYHDE
LifRAD51-5? 1 -----MTMTRQWYHDE
LbrRAD51-5? 61 EGVSGSDDRSQVVESTIGGLPVGGLHELYGPPLSGKSWLLRRRVGAAVVRMTAYRQWYHDE
TbrRAD51-5 1 -----MSVCPPTTGMT
TcrRAD51-5 1 -----MAMVPPPEALT

LmaRAD51-5? 12 LERVSKWAVETPRSTHTYDDEAQAANKDDEGCGCEGVADTWADSTGASPVVTAMEEWDLYV
LifRAD51-5? 12 LELASKWAVETPRSTHTYDDEAQAANKDDEGCGCEGVADTWADSTGASPVVTAMEEWDLYV
LbrRAD51-5? 121 LERVSKRAVEATLFTREKTDNEARAKDDEDGCEADDEHICANSNPPSPHTAMEEWDLYV
TbrRAD51-5 13 AERHSQRLALLTSQTLLOHDLNRRFTOHAVFSGSEELDRLLPDGGMHCGVLEVEIG---
TcrRAD51-5 13 AEDVSRRLAALASASEVLEVERCFSRRAVFSHGSAAIDRLLPDGEVACGVLEVEIG---
A

LmaRAD51-5? 72 CLVSGAGACSPHTHQLTAPPSPSLLSPDVRSWVELVAFDSSSTLDRQGEAFVGTGPAHW
LifRAD51-5? 72 CLVSGAGACSPHTHQLTAPPSPSLLSPDVRSWVELVAFDSSSTLDRQGEAFVGTGPAHY
LbrRAD51-5? 181 CLVRCAGACSRHTHQLTAPPSPSLLSPDVRSWVELVAFDSSSTLDRQGEAFVGTGPAHY
TbrRAD51-5 70 -----PP-----SGGKSRLLVRRMISSPAQGALEWITRE--WDVGHCD
TcrRAD51-5 70 -----PP-----AAGKSHLYQQMVAEFAARGSVQWITAKRSRTAMGG

LmaRAD51-5? 132 HASTHRRRQOORDYAEQIHFRVWVHSPNELLAFLEHLCGNAALAFSAGAAFDAAAPSTIVFP
LifRAD51-5? 132 HASTHRRRQOORDYAEQIHFRVWVHSPNELLAFLEHLCGNAALAFSAGAAFDAAAPSTIVFP
LbrRAD51-5? 241 YSSSE-COCHRDYAEQIHFRVWVHSPNELLAFLEHLCGNAALAFSAGAAFDAAAPSTIVFP
TbrRAD51-5 106 GSPKGLVEVQCLLRARAECCPRE--WCVFYVLSDPSSLNRRHLREELKRALQRAML
TcrRAD51-5 107 NSVDRCQQQQQQPHEEMEEKKCPD--WSVFLVSDPSSVSEQHIELLKRRLASATA

LmaRAD51-5? 192 VPLVAQOQPPSSLOLSESSSTTIDRGOKRRRSPRTAVSSSSVSPSCRLPORTWRLORO
LifRAD51-5? 192 APLVAQOQPPSSLOLSCGSSATIDRGOKRRRSPRTAVSSSSVSPFRNFPORWRLORO
LbrRAD51-5? 300 VERVALCOQLLPSQLARCSLTHAMRGOKQHRSEGTMPSSPFLACSLDQCTWRLORO
TbrRAD51-5 163 CDVHCEG-----EHELLEDDITERVAVVNATLNDLNFREFVHEEYPSMHHANORR
TcrRAD51-5 165 NSMQDQD-----DADSLPSVMLKIKFVFPKSPNDLVFFRLSRVVEFESCHHANRRR
B

LmaRAD51-5? 252 RLLLDGLDALWLHPSLGNHCATHGTGOWFABELHRRRLRAVILPRLSYAASNSAVVTPSYA
LifRAD51-5? 252 RLLLDGLDALWLHPSLGNHCATHGTGOWFABELHRRRLRAVILPRLSYAASNSAVVTPSYA
LbrRAD51-5? 360 RLLLDGLDALWLHPSLGNHCATHGTGOWFABELHRRRLRAVILPRLSYAASNSAVVTPSYA
TbrRAD51-5 217 ALVVILSVARLWDPHPCG--ATKARHMAARELVRELRNVMILGNEMREYCYCNDSHHL
TcrRAD51-5 219 VLVVVDMARLWDPHPCG--ATNARHMAARELVRELRNVMILGNEMRDVCSSEVEKRRR

LmaRAD51-5? 312 TAAASFTSPYPHHLYSTVVFVINGCGSSRCFLNPOOLEARLAGPVGCAGWATLPRPS
LifRAD51-5? 312 TAAASFTSPYPHHLYSTVVFVINGCGSSRCFLNPOOLEARLAGPVGCAGWATLPRPS
LbrRAD51-5? 420 TAAASFTSPYPHHLYSTVVFVINGCGSSRCFLNPOOLEARLAGPVGCAGWATLPRPS
TbrRAD51-5 275 DTEAGNVFCS----VOAANAGTSGVGSVAVLVNGCTNTYCHTVE-----PQGVF-
TcrRAD51-5 277 HHHQHDASVS----GQELSV-DCRCSSVAVLVNGCTSVYHRKLATERTLPSKPLGVF-

LmaRAD51-5? 372 GNAWCRAADTRCLVEPAHPGLVSLTPSSSYVHPARVSHGPGAMROSSRCGMTAVGPPSN
LifRAD51-5? 372 GNAWCRAADTRCLVEPAHPGLVSLTPSSSYVCSARVSHGPGAMROSSRCMAKTEGPPSN
LbrRAD51-5? 480 GNAWCRAADTRCLVEPAHPGLVSLTPSSSYVRRPAMAPHSSAVYNGERTITGDFROST
TbrRAD51-5 323 --LWLAARADLFLFPTST-----SGDYPTTGDDGMLCTHOYCAKAVL---
TcrRAD51-5 330 --VWLAARADLFLFVEPLCN-----ADWELQHDRSSGVCCTQOSEHARATLR---

LmaRAD51-5? 432 ANSRESLTVVKGGSCVAATWVLRDVTGGEQET
LifRAD51-5? 432 TNSLESVTVVKGGSRVAATWVLRDVTGGAOES
LbrRAD51-5? 540 ANYLESVTVVKGGSRVAATWVLRNADDEQEA
TbrRAD51-5 370 -----VRVAKGSGSSVPRVGNIFP-----
TcrRAD51-5 377 -----VRVAKGGRTPGCEVTAV-----

```
